# Supplementary material for: Preparation of Advanced CuO Nanowires/Functionalized Graphene Composite Anode Material for Lithium Ion Batteries
Source: Materials (Basel). 2017 Jan 17;10(1):72. doi: 10.3390/ma10010072 (PMC5344618; doi:10.3390/ma10010072)
Supplement: Supplementary file 1 [file materials-10-00072-s001.pdf]

# Supplementary Materials: Preparation of Advanced CuO Nanowires/Functionalized Graphene Composite Anode Material for Lithium Ion Batteries

Jin Zhang, Beibei Wang, Jiachen Zhou, Ruoyu Xia, Yingli Chu and Jia Huang

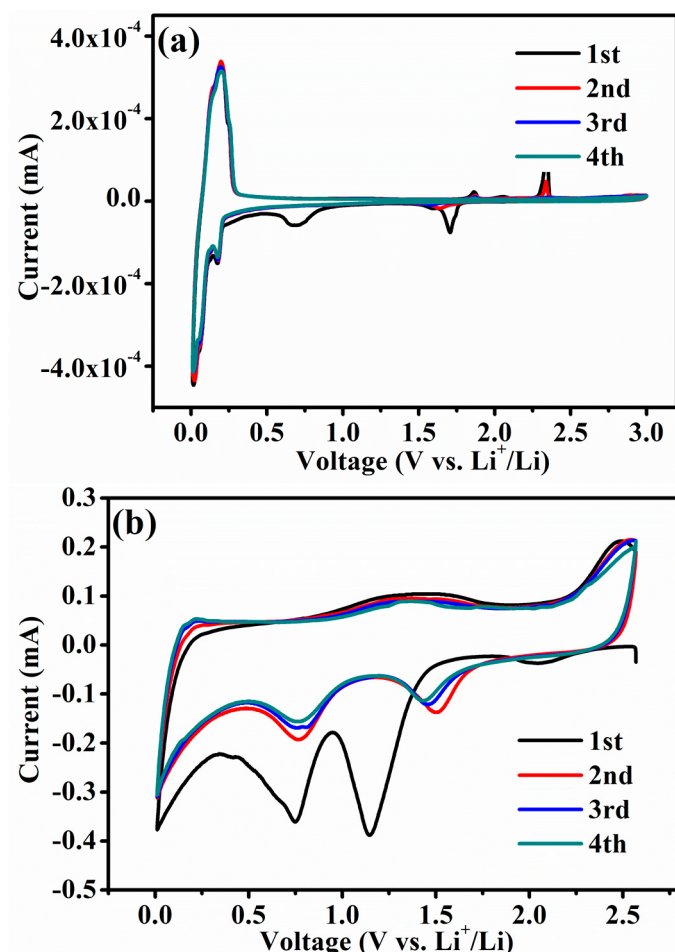

**Figure S1.** The first four CV curves of (a) the f-graphene and (b) pure CuO at a scan rate of  $0.1 \text{ mV}\cdot\text{s}^{-1}$  in the potential range of 0–3.0 V ( $\text{Li}^+/\text{Li}$ ).

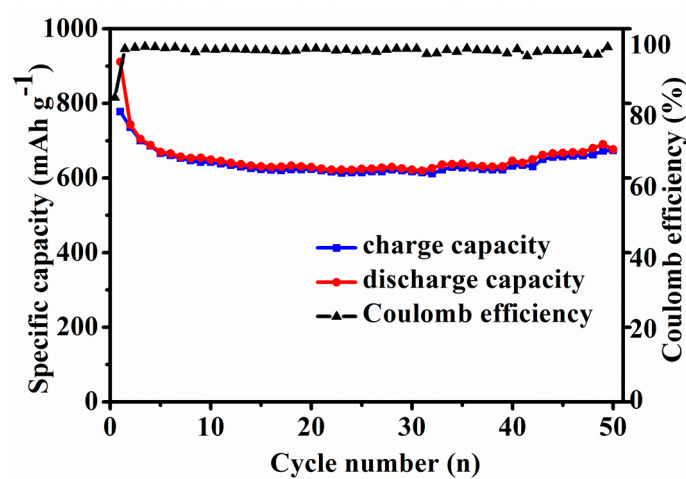

**Figure S2.** Cycling performance and coulombic efficiency of the CuO/f-graphene composite at a current density of  $100 \text{ mA}\cdot\text{g}^{-1}$ .
